# Supplementary material for: Regenerated cellulose strongly adhered by a supramolecular adhesive onto the PVDF membrane for a highly efficient oil/water separation
Source: Royal Society of Chemistry journal article supplement (doi:10.1039/d1gc01998h), 2021-01-01
Supplement: d1gc01998h1.pdf [file d1gc01998h1.pdf]

1

## Supporting Information

2

### 3 **Regenerated cellulose strongly adhered by supramolecular adhesive** 4 **onto PVDF membrane for highly efficient oil/water separation**

5

6 Junkai Gao, Jiaqi Wang, Qinyao Xu, Shibin Wu, Yan Chen\*

7 School of Naval Architecture and Maritime, Zhejiang Ocean University, Zhoushan 316022, China.

8

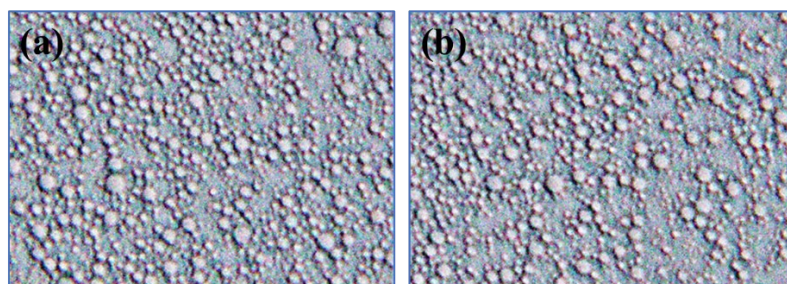

9

10 **Fig.S1** (a) Biological microscope image of sunflower oil-in-water emulsion. (b) Biological  
11 microscope image of sunflower oil-in-water emulsion after 72 hours.

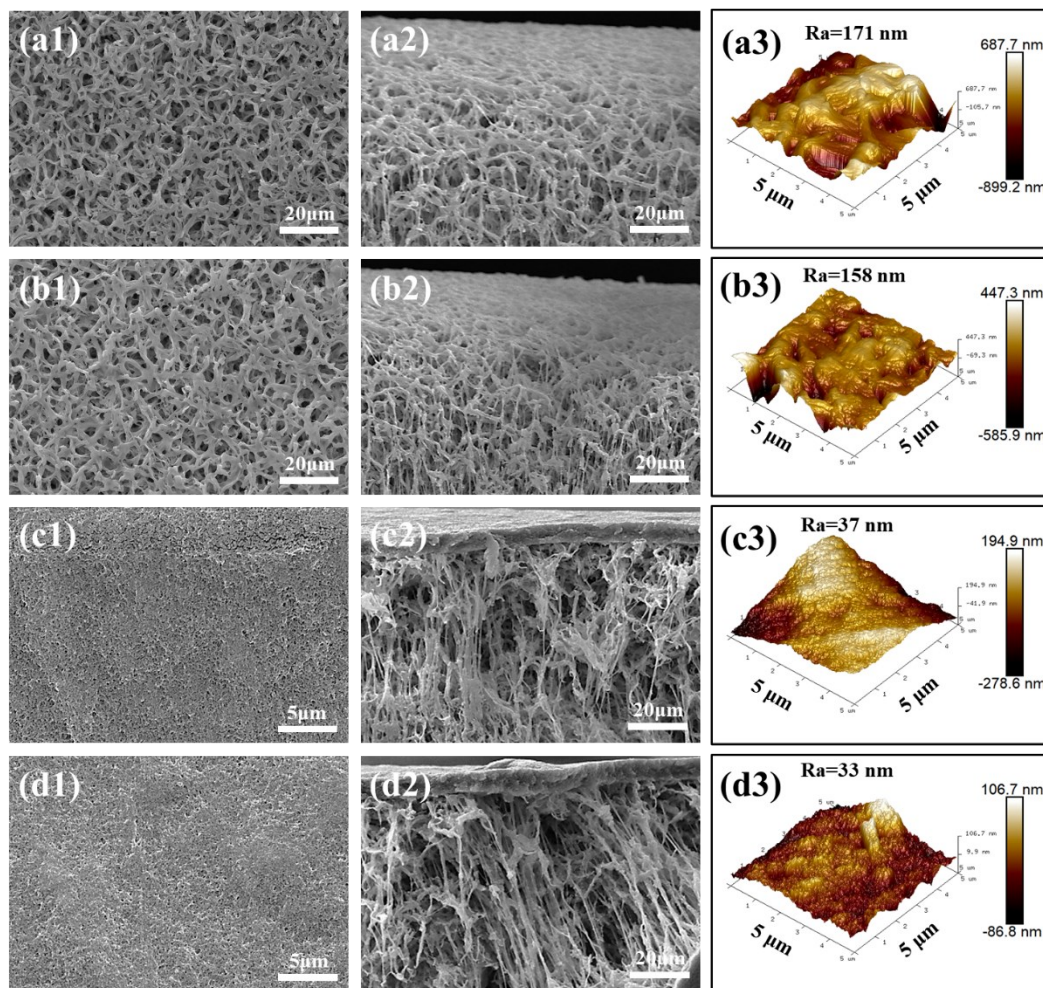

12

13 **Fig. S2** (a1-d1) SEM images of the outside surface morphologies of TA-PVDF, PVA-PVDF,  
 14 Cellulose-TA-PVDF, and Cellulose-PVA-PVDF. (a2-d2) SEM images of the fracture surface  
 15 morphologies of TA-PVDF, PVA-PVDF, Cellulose-TA-PVDF, and Cellulose-PVA-PVDF. (a3-  
 16 d3) AFM images of TA-PVDF, PVA-PVDF, Cellulose-TA-PVDF, and Cellulose-PVA-PVDF.

17

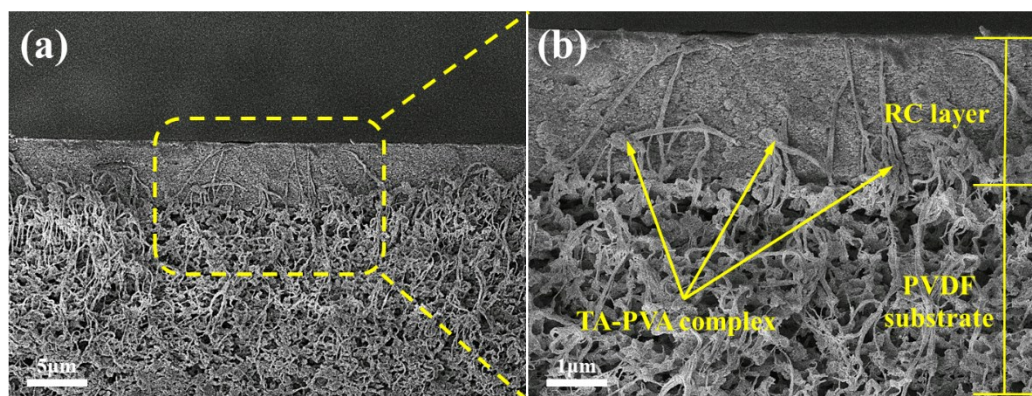

18

19

**Fig. S3** TA-PVA and the RC layer in Cellulose-TA-PVA-PVDF membrane.

20

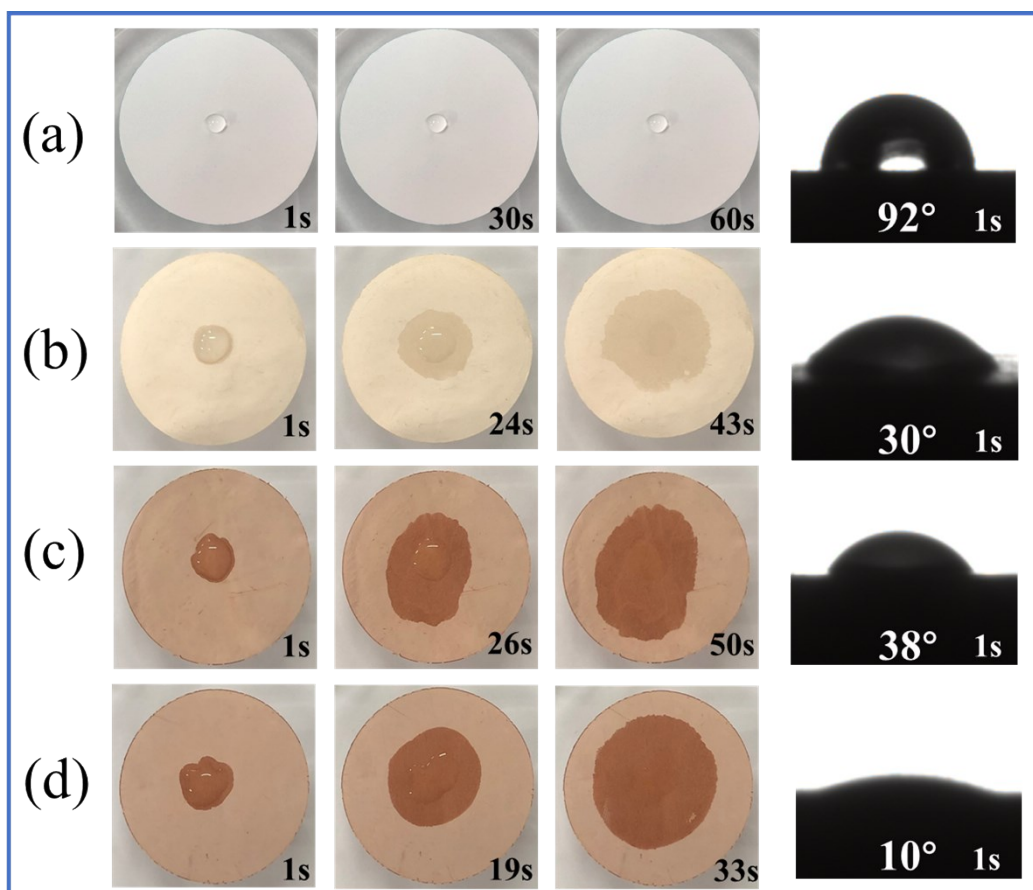

21

22 **Fig.S4** (a) Water droplet on PVDF after 1 s, 30 s, and 60 s, and WCA picture of PVDF. (b) Water  
 23 droplet on TA-PVDF after 1 s, 24 s, and 43 s, and WCA picture of TA-PVDF. (c) Water droplet  
 24 on Cellulose-PVDF after 1 s, 26 s, and 50 s, and WCA picture of Cellulose-PVDF. (d) Water  
 25 droplet on Cellulose-TA-PVA-PVDF after 1 s, 19 s, and 33 s, and WCA picture of Cellulose-TA-  
 26 PVA-PVDF.

27

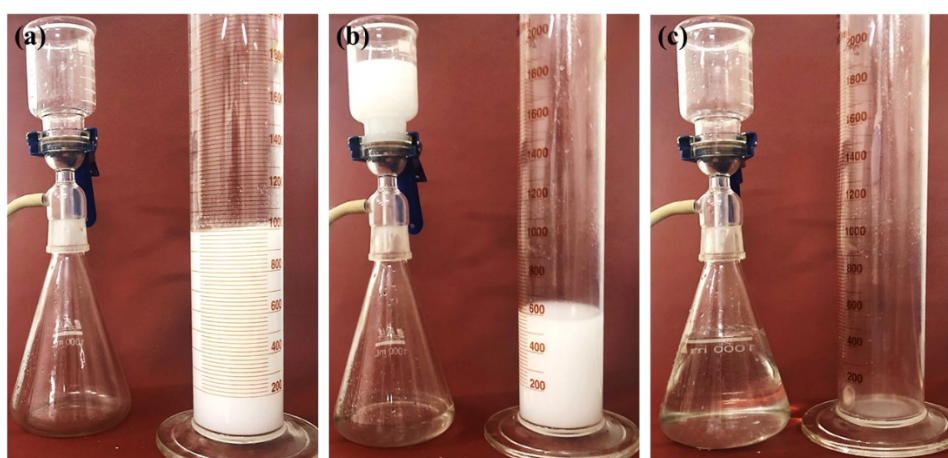

28

29 **Fig. S5** Pictures of 1 L emulsified oil was separated by Cellulose-TA-PVA-PVDF membrane.

30

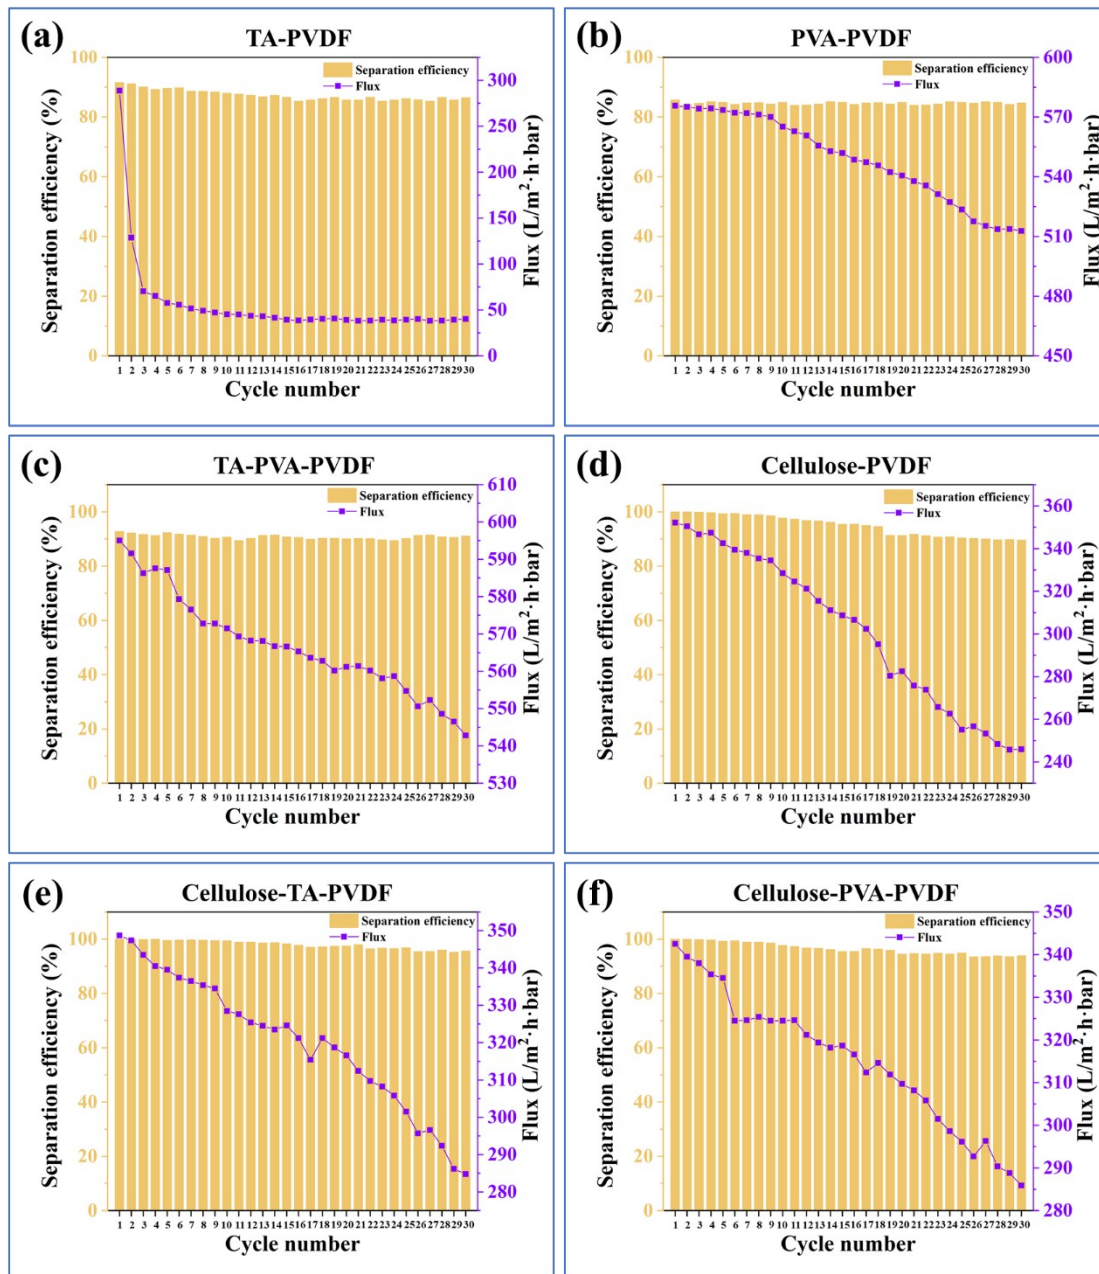

31

32 **Fig. S6** Separation efficiency and flux of (a) TA-PVDF, (b) PVA-PVDF, (c) TA-PVA-PVDF, (d)  
 33 Cellulose-PVDF, (e) Cellulose-TA-PVDF, (f) Cellulose-PVA-PVDF membrane with 30 cycle  
 34 times.

35

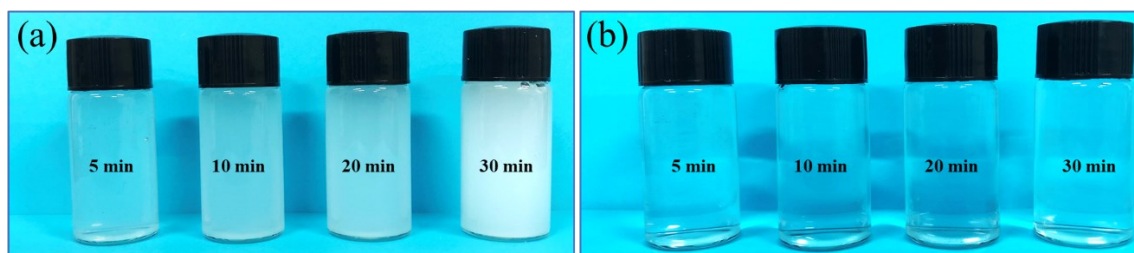

36

37 **Fig. S7** Feed filtrates of (a) Cellulose-PVDF and (b) Cellulose-TA-PVA-PVDF membrane with  
 38 different ultrasonic times.

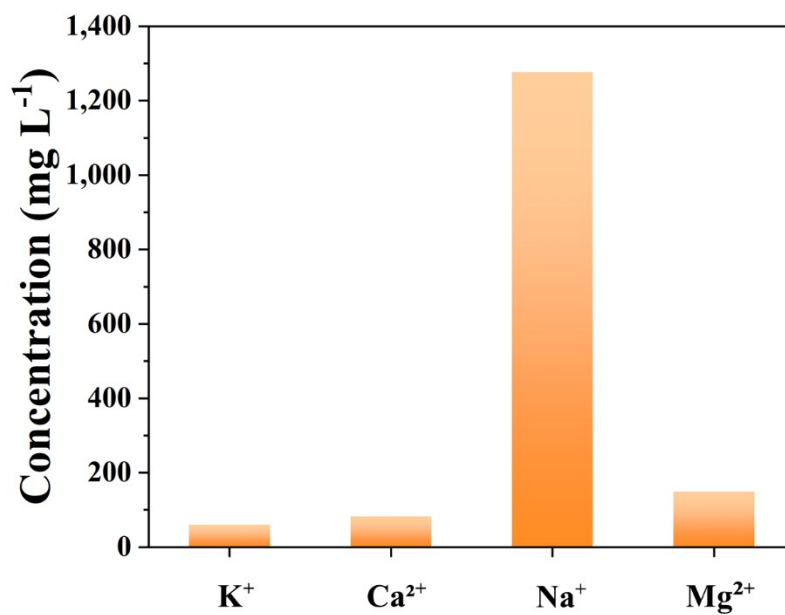

40

41

Fig. S8 The concentration of cations in simulated seawater.

42

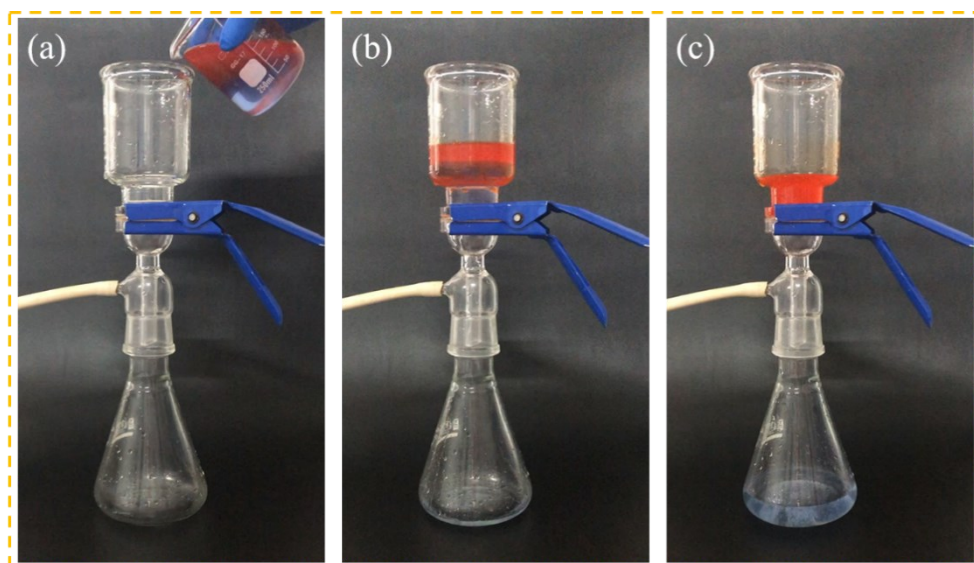

43

44

Fig. S9 Pictures of oil/water mixtures separation by Cellulose-TA-PVA-PVDF membrane.
